# Supplementary material for: Investigating the Perceptions of Care Coordinators on Using Behavior Theory-Based Mobile Health Technology With Medicaid Populations: A Grounded Theory Study
Source: PubMed Central journal article supplement (PMC5380813; doi:10.2196/mhealth.5892), 2017-03-21
Supplement: mhealth_v5i3e36_app3.pdf [file mhealth_v5i3e36_app3.pdf]

Multimedia Appendix 1: Demographic characteristics of New York State Medicaid population in 2014 (N = 4,534,400)

| Characteristics       |                             | %  |
|-----------------------|-----------------------------|----|
| Race/ethnicity        | White                       | 39 |
|                       | Black                       | 19 |
|                       | Hispanic                    | 30 |
|                       | Other                       | 23 |
| Gender                | Female                      | 56 |
|                       | Male                        | 44 |
| Age                   | 0-18                        | 43 |
|                       | 19-64                       | 57 |
| Family Work Status    | At least 1 full-time worker | 65 |
|                       | Part-time workers           | 12 |
|                       | Non-workers                 | 23 |
| Federal Poverty Level | Under 100%                  | 33 |
|                       | 100-199%                    | 32 |
|                       | 200-399%                    | 21 |
|                       | 400%+                       | 14 |
